# Supplementary material for: PARIS, an optogenetic method for functionally mapping gap junctions
Source: eLife journal article supplement (doi:10.7554/elife.43366), 2019-01-14
Supplement: supp [file elife-43366-supp-v1.zip]

Archive with 11 entries (11 files):
- elife_poa_e43366_Figure_4_figure_supplement_3.tif
- elife_poa_e43366_Figure_1_figure_supplement_3.tif
- elife_poa_e43366_Figure_1_figure_supplement_1.tif
- elife_poa_e43366_Figure_1_figure_supplement_4.tif
- elife_poa_e43366_Figure_1_figure_supplement_2.tif
- elife_poa_e43366_Source_code_1.m
- elife_poa_e43366_Figure_4_figure_supplement_2.tif
- elife_poa_e43366_Figure_6_source_data1.txt
- elife_poa_e43366_Figure_4_figure_supplement_1.tif
- elife_poa_e43366_Figure_5_figure_supplement_1.tif
- elife_poa_e43366_Transparent_Reporting_File.pdf
