# Supplementary material for: PARIS, an optogenetic method for functionally mapping gap junctions
Source: eLife journal article supplement (doi:10.7554/elife.43366), 2019-01-14
Supplement: supp [file elife-43366-supp-v1.zip › elife_poa_e43366_Figure_6_source_data1.txt]

>H.walsbyi, Bop1
MSQLALQMSSLGVEGEGIWLALGTIGMLLGMLYFIADGLDVQDPRQKEFYVITILIPAIAAASYLSMFFGFGLTEVSLAN
GRVVDVYWARYADWLFTTPLLLLDIGLLAGASQRDIGALVGIDAFMIVTGLVATLTKVVVARYAFWTISTISMVFLLYYL
VAVFGEAVSDADEDTRSTFNALRNIILVTWAIYPVAWLVGTEGLALTGLYGETLLFMVLDLVAKVGFGFILLRSRAIMGG
GSEPTPSAQETAAD

>H.vallismortis, Cop3
MPAPEGEAIWLWLGTAGMFLGMLYFIARGWGETDSRRQKFYIATILITAIAFVNYLAMALGFGLTIVEIAGEQRPIYWAR
YSDWLFTTPLLLYDLGLLAGADRNTISSLVSLDVLMIGTGLVATLSAGSGVLSAGAERLVWWGISTAFLLVLLYFLFSSL
SGRVADLPSDTRSTFKTLRNLVTVVWLVYPVWWLVGTEGIGLVGIGIETAGFMVIDLVAKVGFGIILLRSHGVLDGAAET
TGAGATATAD

>O.sativa, opsin
MMIEAVDAMKTNSVLPIPLPTSLVSSLTATISATATASVTPLPTVIPGPEIDQQLVGDDGKKTLWVIFVAMVIASAGFAA
LSWRVPIQRRLYHVITTLILIFASISYFAMATGHGVSVHKTVIRHQKTTFPTLHHGRTPVFWARYVDRALTTLILLHDLS
LLAGLNGAHIIMAVVADVIMILTGLFAAFGSEGTPQKWGWYAISCISFLVVIWHLAVNGRAQANARSQKVGSFFLAIAGY
TLVLWTAYPIVWGIADGSRKLSVDAEIIAYAVPDVLAKPIFGLWLLITHANIPETNIDLGGFWSYGFGGEGAVRLEDDGA

>Q9AFD7
TMGKLLLILGSAIALPSFAAAGGDLDISDTVGVSFWLVTAGMLAATVFFFVERDQVSAKWKTSLTVSGLITGIAFWHYLY
MRGVWIDTGDTPTVFRYIDWLLTVPLQMVEFYLILAACTSVAASLFKKLLAGSLVMLGAGFAGEAGLAPVLPAFIIGMAG
WLYMIYELYMGEGKAAVSTASPAVNSAYNAMMMIIVVGWAIYPAGYAAGYLMGGEGVYASNLNLIYNLADFVNKILFGLI
IWNVAVKESSNA

>A4GIH8
MSIIKSLKSVAIASLAILIPSIALAAGGNLEPNDPVGITFWLISIAMVAATVFFLMESLRVDGKWRTSMIVGGLVTLVAA
VHYFYMRDVWVATGASPTVFRYVDWLITVPLQMIEFYLILAACTAIAVGVFWRLMIGTMVMLIGGYLGEAGFINATVGFV
IGMAGWGYILYEIFAGEAGKVAAEGAPPSVQSAFNTMRLIVTIGWAIYPLGYFFGYMTGGVDANSLNLIYNVADVVNKIG
FCLAIWAAATSQSEAAK

>A0A0U2VXF3
MEYALAQDDFVGISFWLATAIMLASTVFFLAERDNVRGKWKTSLTVAALVTGVAFWHYLYMRGVWITTGDSPTVYRYIDW
LITVPLQIVEFYLILAAVTSVSASLFWKLLVGSLVMLIGGYMGEAGYMAKMPAFVIGMVGWAYIIYLIFAGEAANVNASS
GNAASQMAFKSIRMIVLVGWAIYPIGYLMGSSEALNIIYNLADLVNKTAFGVVIWAAAVSDS

>Q9AFG0
TMGKLLLILGSVIALPTFAAGGGDLDASDYTGVSFWLVTAALLASTVFFFVERDRVSAKWKTSLTVSGLVTGIAFWHYMY
MRGVWIETGDSPTVFRYIDWLLTVPLLICEFYLILAAATNVAAGLFKKLLVGSLVMLVFGYMGEAGIMNAWGAFVIGCLA
WVYMIYELWAGEGKAACNTASPAVQSAYNTMMYIIIFGWAIYPVGYFTGYLMGDGGSALNLNLIYDLADFVNKILFGLII
WNVAVKESSNAK

>A0A0U2XBX5
MESVLKPDDFVGISFFVATMAMMASAVFFFFERGSVKGKWKTSLTVAGLITGVAAIHYLYMRDMWVETGQSPTVFRYIDW
LITVPLQIVEFYLILAAITIVPVALFWRLLIYSLVMLVFGYLGEAGFMNVTLGFVIGMAGWLLILYEIFAGEASKINADS
ANASCQKAFNALRLIVTIGWAIYPIGYVFGYLLESSNINAVNIIYNYADLINKTAFGLVIWAAAIKDSEASA

>A4GIJ7
MKLSMGKVMKTAMIAGGLATLPTVANAATAMLAATDYVGISFWTISMAMMAAAIFFLMEAGRLPGKWKTAMTIGALVQIV
AAVHYFYMRDVWVSTGETPTVYRYVDWLITVPLQMVEFYFILAAVAVVSAGMFWRLMIGSLVMLVAGYLGEAGLVNAWLG
FVVGMAGWAYILYEIFAGEAGKVSAESAPEAVQKSFSTMRMIVTVGWAIYPLGYFLGYLNGAADAVTLNVIYNVADVVNK
IAFVGVIWAAANAEAAKA

>H.TP009, ArchT
MDPIALQAGYDLLGDGRPETLWLGIGTLLMLIGTFYFIVKGWGVTDKEAREYYSITILVPGIASAAYLSMFFGIGLTEVT
VAGEVLDIYYARYADWLFTTPLLLLDLALLAKVDRVSIGTLVGVDALMIVTGLIGALSHTPLARYSWWLFSTICMIVVLY
FLATSLRAAAKERGPEVASTFNTLTALVLVLWTAYPILWIIGTEGAGVVGLGIETLLFMVLDVTAKVGFGFILLRSRAIL
GDTEAPEPSAGAEASAAD

>P.nodorum, UC
MLVEQFEEVLKKTSGLPLPTASPTHVAPIPSVVPTTPELQFIGESGQKTLWVVFVLMIIASAGFTALSWRVPLSKRLYHT
ITTMITIFAALSYFAMATGHGVSVQKIIVREQHDHVPDTFTEVHRQVFWARYVDWSVTTPLLLLDLGLLAGMSGGHIIMA
IVADLIMILTGLFAAFGEEGTPQKWGWYTIACIAYIFVIWHLALNGGANATSKGPKLRSFFVAIGGYTLLLWTAYPIVWG
LADGSRKIGVDGEVIAYAILDVLAKGVFGAWLLITHAKLRESDVELNGFWSNGLNSEGAVRLGEDDGA

>L. maculans, Mac
MIVDQFEEVLMKTSQLFPLPTATQSAQPTHVAPVPTVLPDTPIYETVGDSGSKTLWVVFVLMLIASAAFTALSWKIPVNR
RLYHVITTIITLTAALSYFAMATGHGVALNKIVIRTQHDHVPDTYETVYRQVYYARYIDWAITTPLLLLDLGLLAGMSGA
HIFMAIVADLIMVLTGLFAAFGSEGTPQKWGWYTIACIAYIFVVWHLVLNGGANARVKGEKLRSFFVAIGAYTLILWTAY
PIVWGLADGARKIGVDGEIIAYAVLDVLAKGVFGAWLLVTHANLRESDVELNGFWANGLNREGAIRIGEDDGA

>C.vulgaris, CvRh
MAVHQIGEGGLVMYWVTFGLMAFSALAFAVMTFTRPLNKRSHGYITLAIVTIAAIAYYAMAASGGKALVSNPDGNLRDIY
YARYIDWFFTTPLLLLDIILLTGIPIGVTLWIVLADVAMIMLGLFGALSTNSYRWGYYGVSCAFFFVVLWGLFFPGAKGA
RARGGQVPGLYFGLAGYLALLWFGYPIVWGLAEGSDYISVTAEAASYAGLDIAAKVVFGWAVMLSHPLIARNQTDGSLLI
NSTNDPFVASTTHIPERQGGIFGGLMGKKRGAGTPLATNEGVPRKAAPTAATTTAGNPATAAEV

>A.acetabulum, Ace
MADVETETGMIAQWIVFAIMAAAAIAFGVAVHFRPSELKSAYYINIAICTIAATAYYAMAVNYQDLTMNGERQVVYARYI
DWVLTTPLLLLDLIVMTKMGGVMISWVIGADIFMIVFGILGAFEDEHKFKWVYFIAGCVMQAVLTYGMYNATWKDDLKKS
PEYHSSYVSLLVFLSILWVFYPVVWAFGSGSGVLSVDNEAILMGILDVLAKPLFGMGCLIAHETIFKKM

>G.fujikuroi, CarO
MADHLYARKNDALNVNPDIVNGQRSDINITVRGSDWYWAVCAVMTVSTFAFLGLGMRKPRTDRIFHYITAGITMIASIAY
FTMASNLGWTPIAVEFQRSNHRVAGIYREIFYARYIDWFLTTPLLLTDLLLTAGMPWPTVLWVILVDWVMIVTGLVGALV
KSSYKWGYFAFGCAALAYIVYVLAWEARLHAKHVGPDVGRTFVMCGSLTAVVWILYPIAWGVCEGGNLIAPDSEAVFYGI
LDLIAKPVFGALLLWGHRNIDPARLGLRIRDIDERIFPDGPNNKVASGHGARNDTATASGSNVNPNA

>M.larici, UC
MLNTQLQNLLNNPLTPIQAYADSDLFSTQNVLSRLSHSVLWVVFAIMILSTVVIGILTTQQQKNNKLFHHITLTINFIAA
ISYYSMASGIGISLSHHGARPLFWARYLDWLLTTPLLLTDLGLLAGIPIQDIVLLVLSDVVMVVTGLLGAINQSESTKWG
YFVMSCIFFVYVVYELATTARRTSYLKSSRVGFLFTAIAVYSMLLWTVYPVVWALSEGSSIISPDLEILFYAVLDVMAKA
VFGFWLLIAHSIIPESNVIVSNSFTDPRIQNGVGYSAIAENEEAVRD

>S.chartarum, UC
MDSIFEAGGHGGNPAPIKPIPTIVPTPTEYETLHGTGHKTLWVVFVIMLISSAVFAFRSWNIPVSRRLYHVITTLITITA
AISYFAMASGDATSFSCHSVEDHHGKHIPSTHHDVCRQVFWARYVDWSLTTPLLLLDLSLLAGISGAHTIMAIVADVIMV
LAGLFAAYGKEHTAQKWGWYAIGCVAYLFVIWHLGVNGRRAVAARGDKTTKLFSSLALFTLVLWTIYPIIWGIADGARKV
SVDTEIISYAVLDVLAKPVFGTWLLIAHRNIPETNVELGGYWAHGLTNGEGRIRIGEEDDAA
