# Supplementary material for: PARIS, an optogenetic method for functionally mapping gap junctions
Source: eLife journal article supplement (doi:10.7554/elife.43366), 2019-01-14
Supplement: supp [file elife-43366-supp-v1.zip › elife_poa_e43366_Source_code_1.m]

%% Ê±¼äÐòÁÐÍ¼ÏñµÄÊäÈë
%Ä¿Ç°Ö»ÄÜÊäÈë100ÒÔÄÚµÄÖ¡Êý£¬²¢ÇÒ×îºóÒ»Î»ÊÇ0£¬°üÀ¨10,20,30,40,50,60,70,80,90.
%Èç¹ûÄãµÄÊ±¼äÐòÁÐ²»ÊÇÕâ¸öÊýÄ¿£¬¿ÉÒÔÓÃImageJÉ¾³ýÒ»Ð©×öÎ±²ÊÓÃ²»µ½µÄÖ¡Êý¡£
clc; clear all; close all;
%ÊäÈë¶àÉÙÖ¡£¬ÔÚÏÂÃæµÄ±äÁ¿num,num1ÖÐ½øÐÐ¶¨Òå£¬±ÈÈçÈç¹ûÊäÈë70Ö¡£¬¶¨ÒåÏÂÃæµÄnum=9,
% ¶ønum1=6
num = 9;  
num1 = 2;  %¿ÉÐÞ¸Ä
Img = [];
      % ÊäÈëµÄÍ¼Æ¬ÐòÁÐÐèÒªÓÃImageJ ×ª»»³É8 bit¸ñÊ½¡£È»ºóÐÞ¸ÄÏÂÃæµÄÂ·¾¶£º 
      % E:\\wuling-weicai\\ct2\\ct00%d%d.tif ×÷ÎªÊäÈë
  for j = 0 : num1
    for i = 0 : num
     filename = sprintf('E:\\image\\20161128 PKA PKC\\293t M3-BFP2 pH\\forskolin 8h\\5 3 cells\\tu\\a00%d%d.tif',j, i);  % ¿ÉÐÞ¸Ä
    I = imread(filename);
    Img(:, :,j*10+i+1) = I;
    end
  end


  
%%  ¼ÆËãF0,ÒÔ¼°F0µÄ·½²î
%   ±äÁ¿num2 ¶¨Òå¼ÆËãF0ÐèÒªÆ½¾ùµÄÖ¡Êý£¬¸ù¾Ý×Ô¼ºÊµÑé½øÐÐÐÞ¸Ä.±ÈÈçÐèÒªÆ½¾ù5Ö¡£¬Ôònum2=4.
%   ±äÁ¿stdevimage£º ±íÊ¾F0µÄ·½²î¡£
num2 = 5;      %¿ÉÐÞ¸Ä                
I = double(I);                 
imsize = size(I);  
sumimage = zeros(imsize); 
sum2image = zeros(imsize);
varianceimage = zeros(imsize);
stddevimage = zeros(imsize);
Fo = zeros(imsize);

% Èç¹ûF0²»ÊÇ´ÓµÚÒ»Ö¡¿ªÊ¼£¬ÏÂÃæµÄÁ½¸öi+1,¿ÉÒÔ×ÔÐÐÐÞ¸Ä£¬±ÈÈçÊÇ´ÓµÚ5Ö¡µ½µÚ10Ö¡£¬i+1
%ÐÞ¸ÄÎªi+5,num2µÈÓÚ5.
for i = 0 : num2
    sumimage(:,:) = sumimage(:,:) + double(Img(:,:,i+1));  %¿ÉÐÞ¸Ä
    sum2image(:,:) = sum2image(:,:) + double(Img(:,:,i+1)).^2; %¿ÉÐÞ¸Ä
end
Fo(:,:) = sumimage(:,:)/(num2+1);  % ¼ÆËãµÃµ½Æ½¾ùºóµÄF0,
varianceimage(:,:) = (sum2image(:,:)/(num2+1)) - Fo(:,:).^2;
stddevimage(:,:) = sqrt(varianceimage(:,:));   % ¼ÆËãµÃµ½Æ½¾ùºóµÄF0µÄ·½²î

 

%%  ¼ÆËãµÃµ½ÐÅºÅÖµ£º deltaF/F0
deltaFimageseries = [];
F = zeros(imsize);

% µÃµ½Ò»¸öÃ¿Ò»Ö¡¼õµôF0ºóµÄÊ±¼äÐòÁÐÍ¼Ïñ¾ØÕó,¼´deltaFµÄ¾ØÕódetaFimageseries¡£²¢ÇÒÈ¡ãÐÖµ¡£Èç¹ûÏñËØµãµÄÖµÐ¡ÓÚ1±¶£¨»ò2±¶£¬0.5±¶µÈµÈ£¬¸ù¾Ý×Ô¼ºµÄÊµÑé¿ÉÒÔÐÞ¸Ä£¬×îºóÐ´ÎÄÕÂËµÃ÷¼´¿É£¬Ò»°ã¶¼ÊÇÈ¡ÁË1±¶»ò2±¶£©·½²î£¬
% ½«¸ÃÏñËØµãµÄÖµÈ¡Îª0Öµ¡£
 for j = 0 : num1
    for i = 0 : num
     for n = 1 : imsize(1)
       for m = 1 : imsize(2)
           deltaFimageseries(n, m,j*10+i+1) = Img(n, m,j*10+i+1)-Fo(n,m);
               if ( abs(deltaFimageseries(n,m,j*10+i+1))<=2*stddevimage(n,m))  %¿ÉÐÞ¸Ä,±ÈÈç¸Ä³É2*stddevimage(n,m)
                   deltaFimageseries(n,m,j*10+i+1) = 0;
               else
                   deltaFimageseries(n,m,j*10+i+1) = deltaFimageseries(n,m,j*10+i+1);
               end
       end
     end   
    end
 end
 
 
%F0È¡ãÐÖµ £¬¼ÆËãdeltaF/F0£¬ µÃµ½Ò»¸ödeltaF/F0µÄÒ»¸öÊ±¼äÐòÁÐÍ¼Ïñ¾ØÕóratioimageseries.
ratioimageseries = [];
for j = 0 : num1
    for i = 0 : num
     for n = 1 : imsize(1)
       for m = 1 : imsize(2)
           if (Fo(n,m)<=0.5)
                   ratioimageseries(n,m,j*10+i+1) = 0;
           else
                   ratioimageseries(n,m,j*10+i+1) = deltaFimageseries(n,m,j*10+i+1)./Fo(n,m);
           end
       end
     end   
    end
end


%%  ×÷Î±²ÊÍ¼
  averagefilm(:,:,:)=double(ratioimageseries(:,:,:));
  
%¶Ô¾ØÕó½øÐÐÆ½»¬ÂË²¨³ýÔë
for j = 0 : num1
    for i = 0 : num
       averagefilm(:,:,10*j+i+1) = medfilt2(averagefilm(:,:,10*j+i+1 ),[4,4]);
    end
end

%Êä³öÎ±²Êmoive
for j = 0 : num1
    for i = 0 : num
figure(1),imshow(averagefilm(:,:,10*j+i+1),[0,0.4],'Border','tight'); % Î±²ÊµÄ·¶Î§[0,3]¿ÉÐÞ¸Ä
colormap(jet);
set(gcf,'visible','on');
str=['E:\image\20161128 PKA PKC\293t M3-BFP2 pH\forskolin 8h\5 3 cells\wc\' num2str(i+10*j),'.bmp'];%Êä³öµØÂ·¾¶¿ÉÒÔÐÞ¸Ä
print(1,'-dbmp','-r32',str); 
    end
end


  
