# Supplementary figures and images for: PARIS, an optogenetic method for functionally mapping gap junctions
Source: eLife journal article supplement (doi:10.7554/elife.43366), 2019-01-14

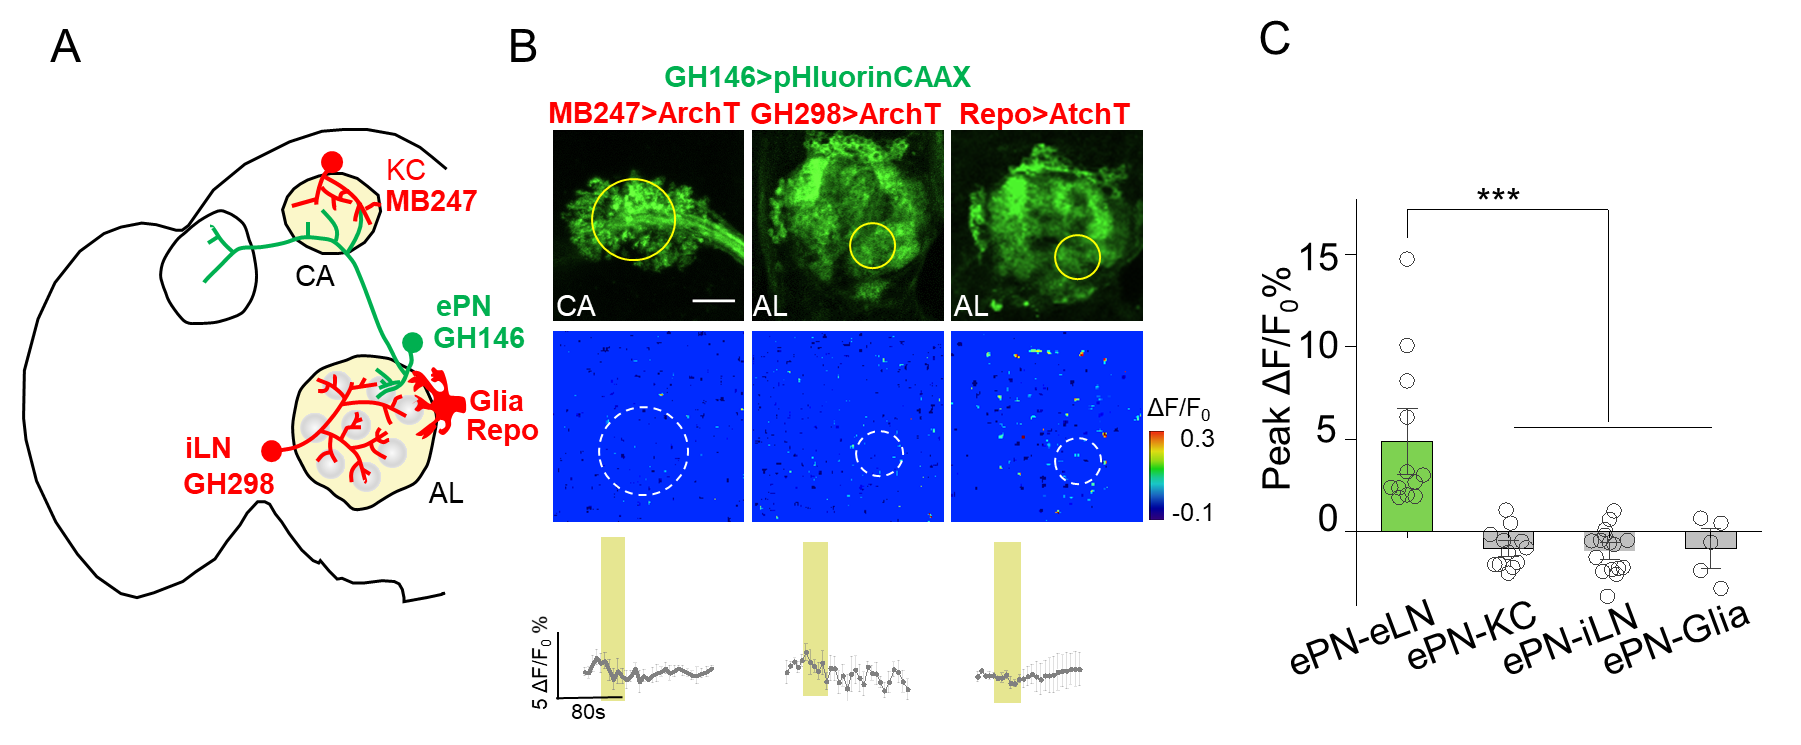

Supplement: supp [file elife-43366-supp-v1.zip › elife_poa_e43366_Figure_4_figure_supplement_3.tif]

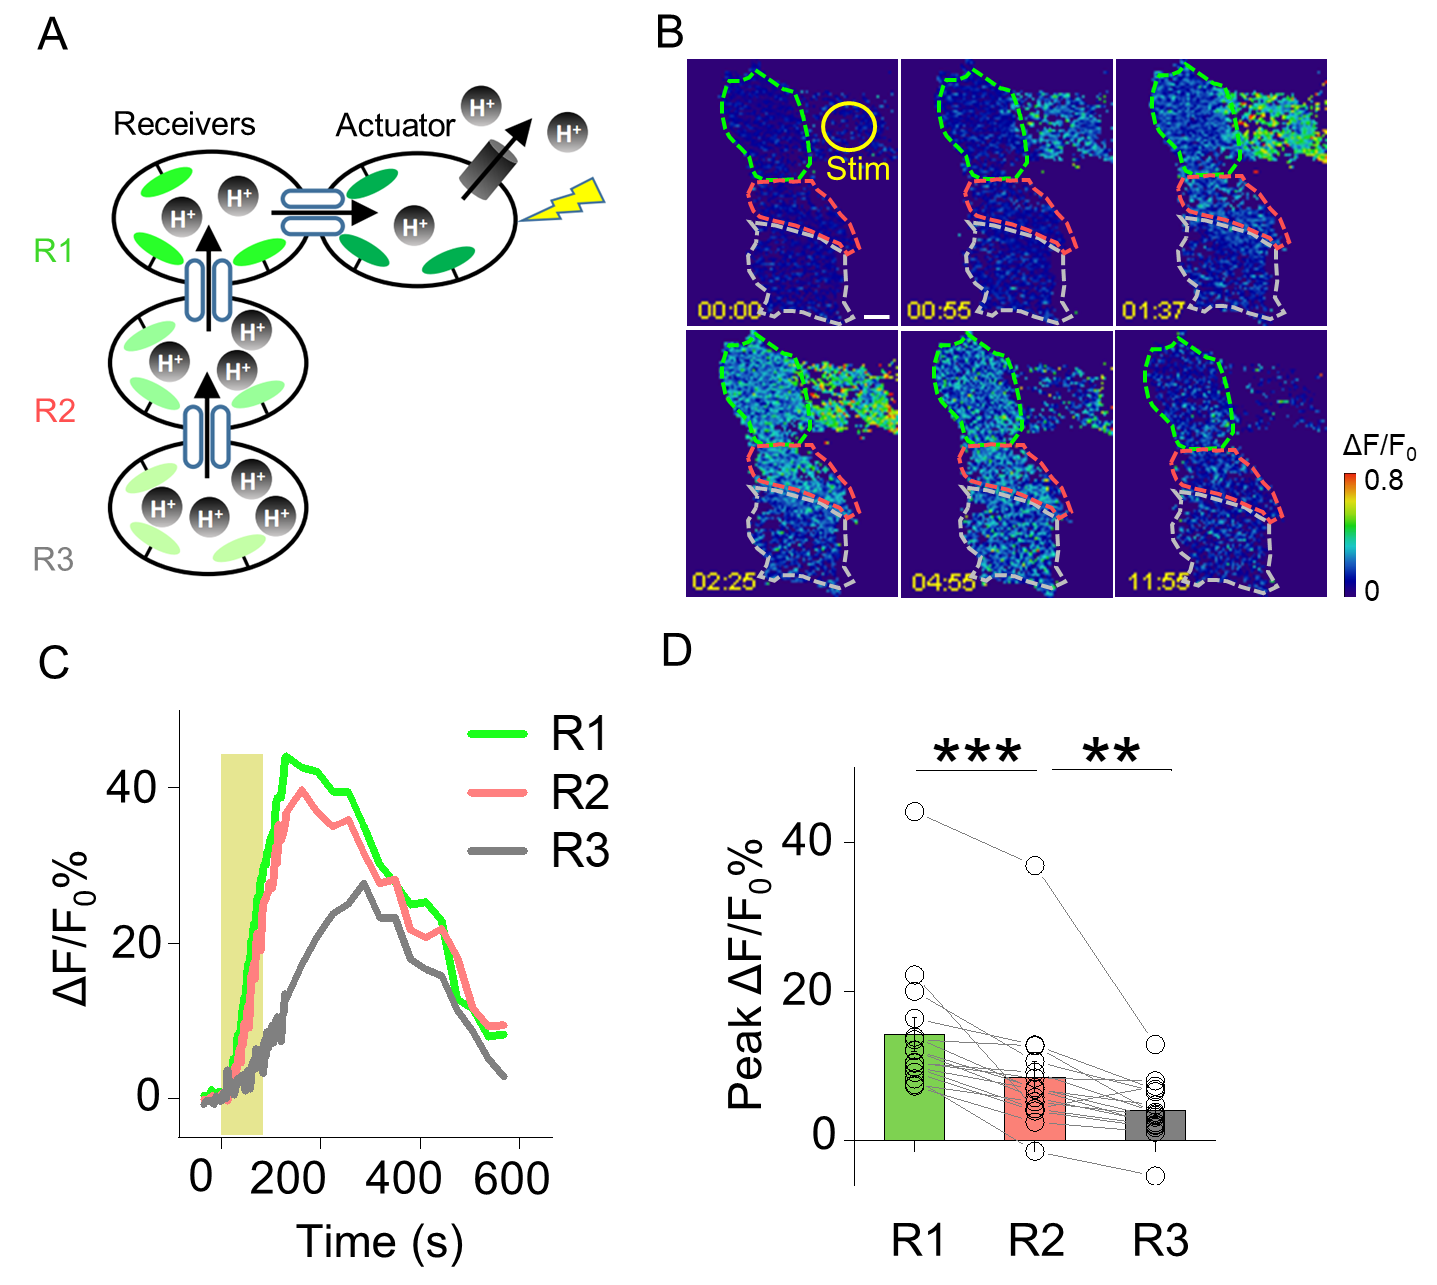

Supplement: supp [file elife-43366-supp-v1.zip › elife_poa_e43366_Figure_1_figure_supplement_3.tif]

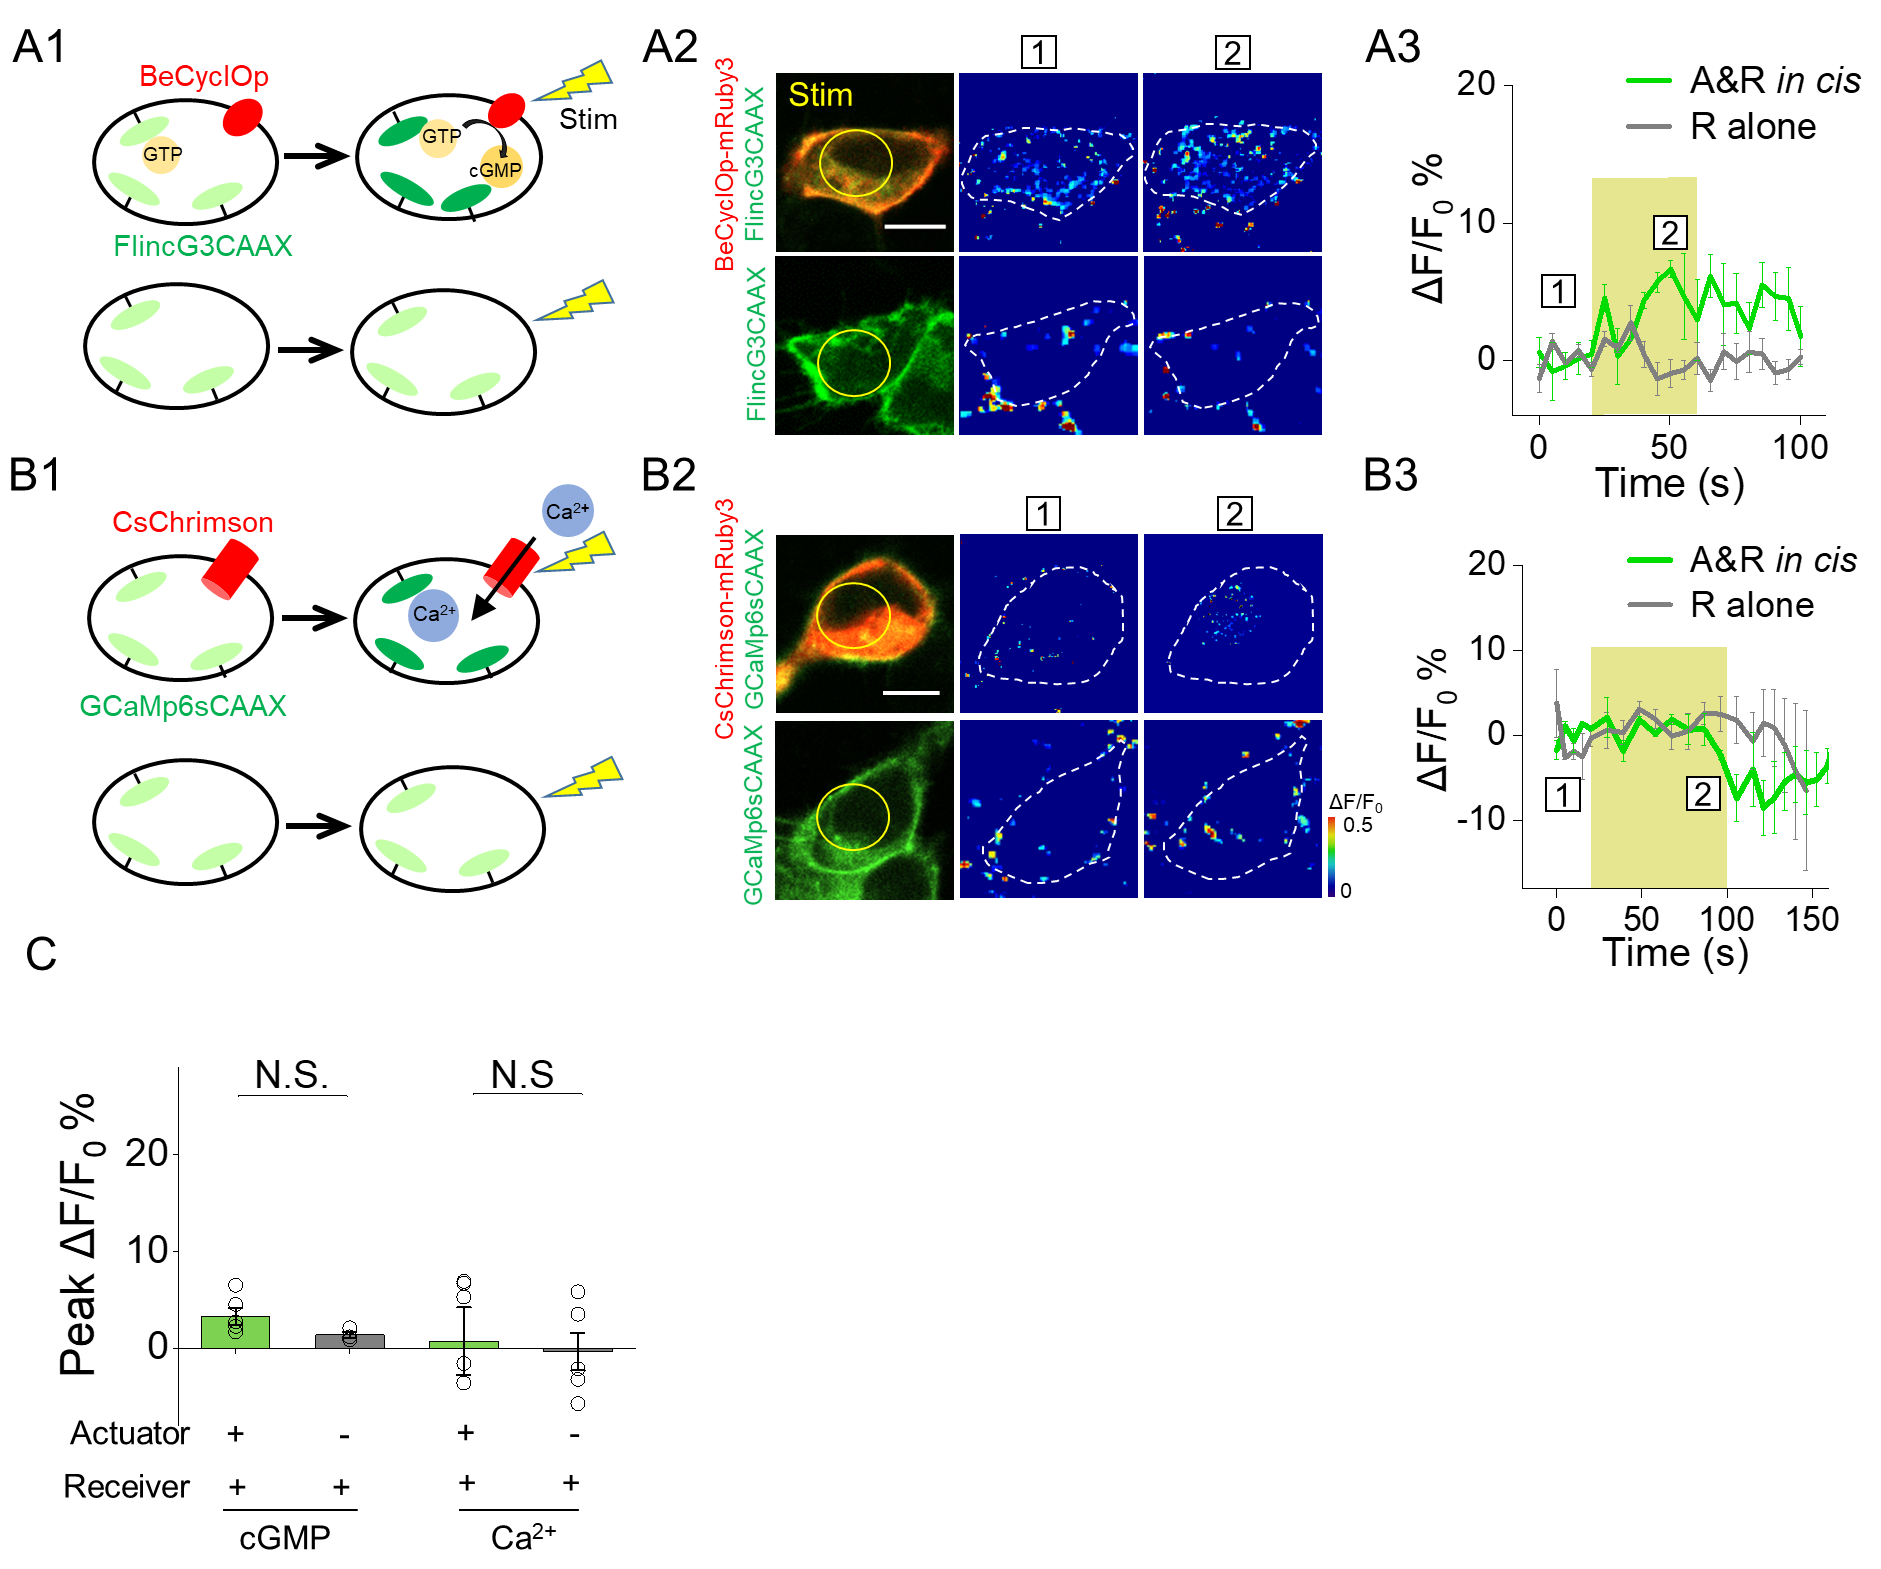

Supplement: supp [file elife-43366-supp-v1.zip › elife_poa_e43366_Figure_1_figure_supplement_1.tif]

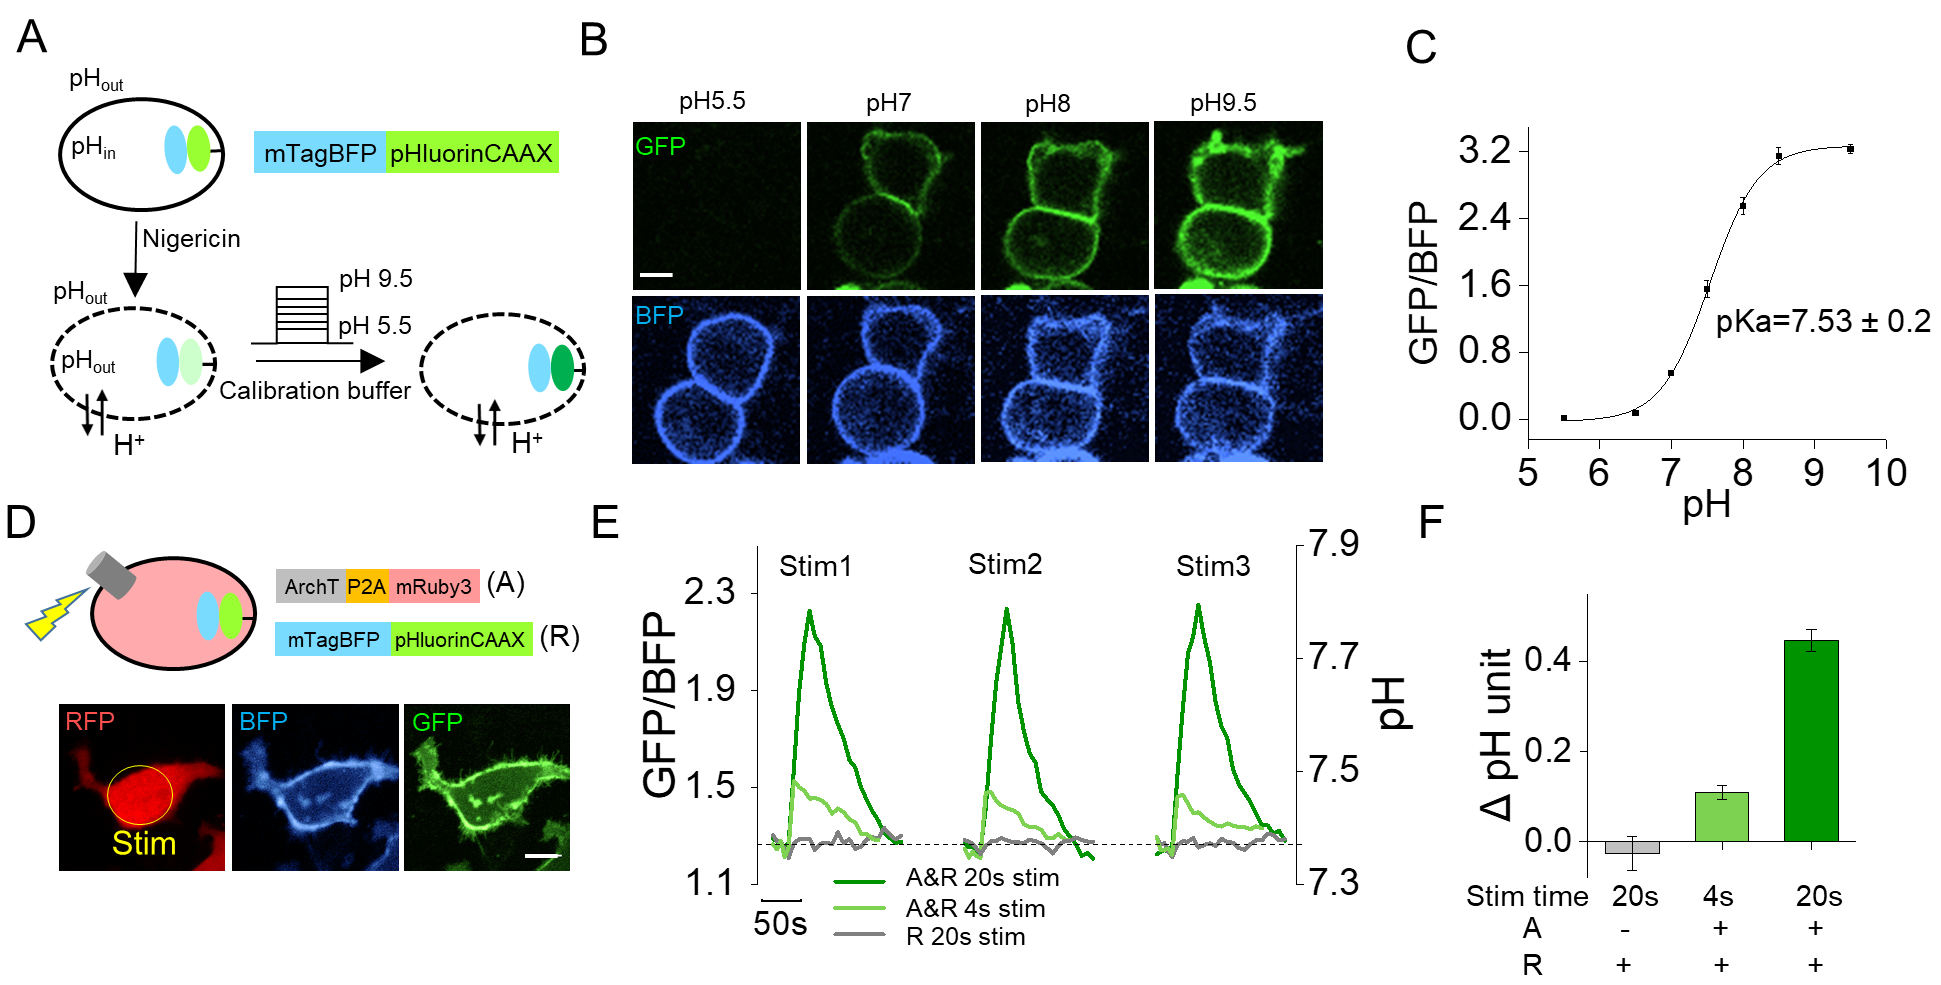

Supplement: supp [file elife-43366-supp-v1.zip › elife_poa_e43366_Figure_1_figure_supplement_4.tif]

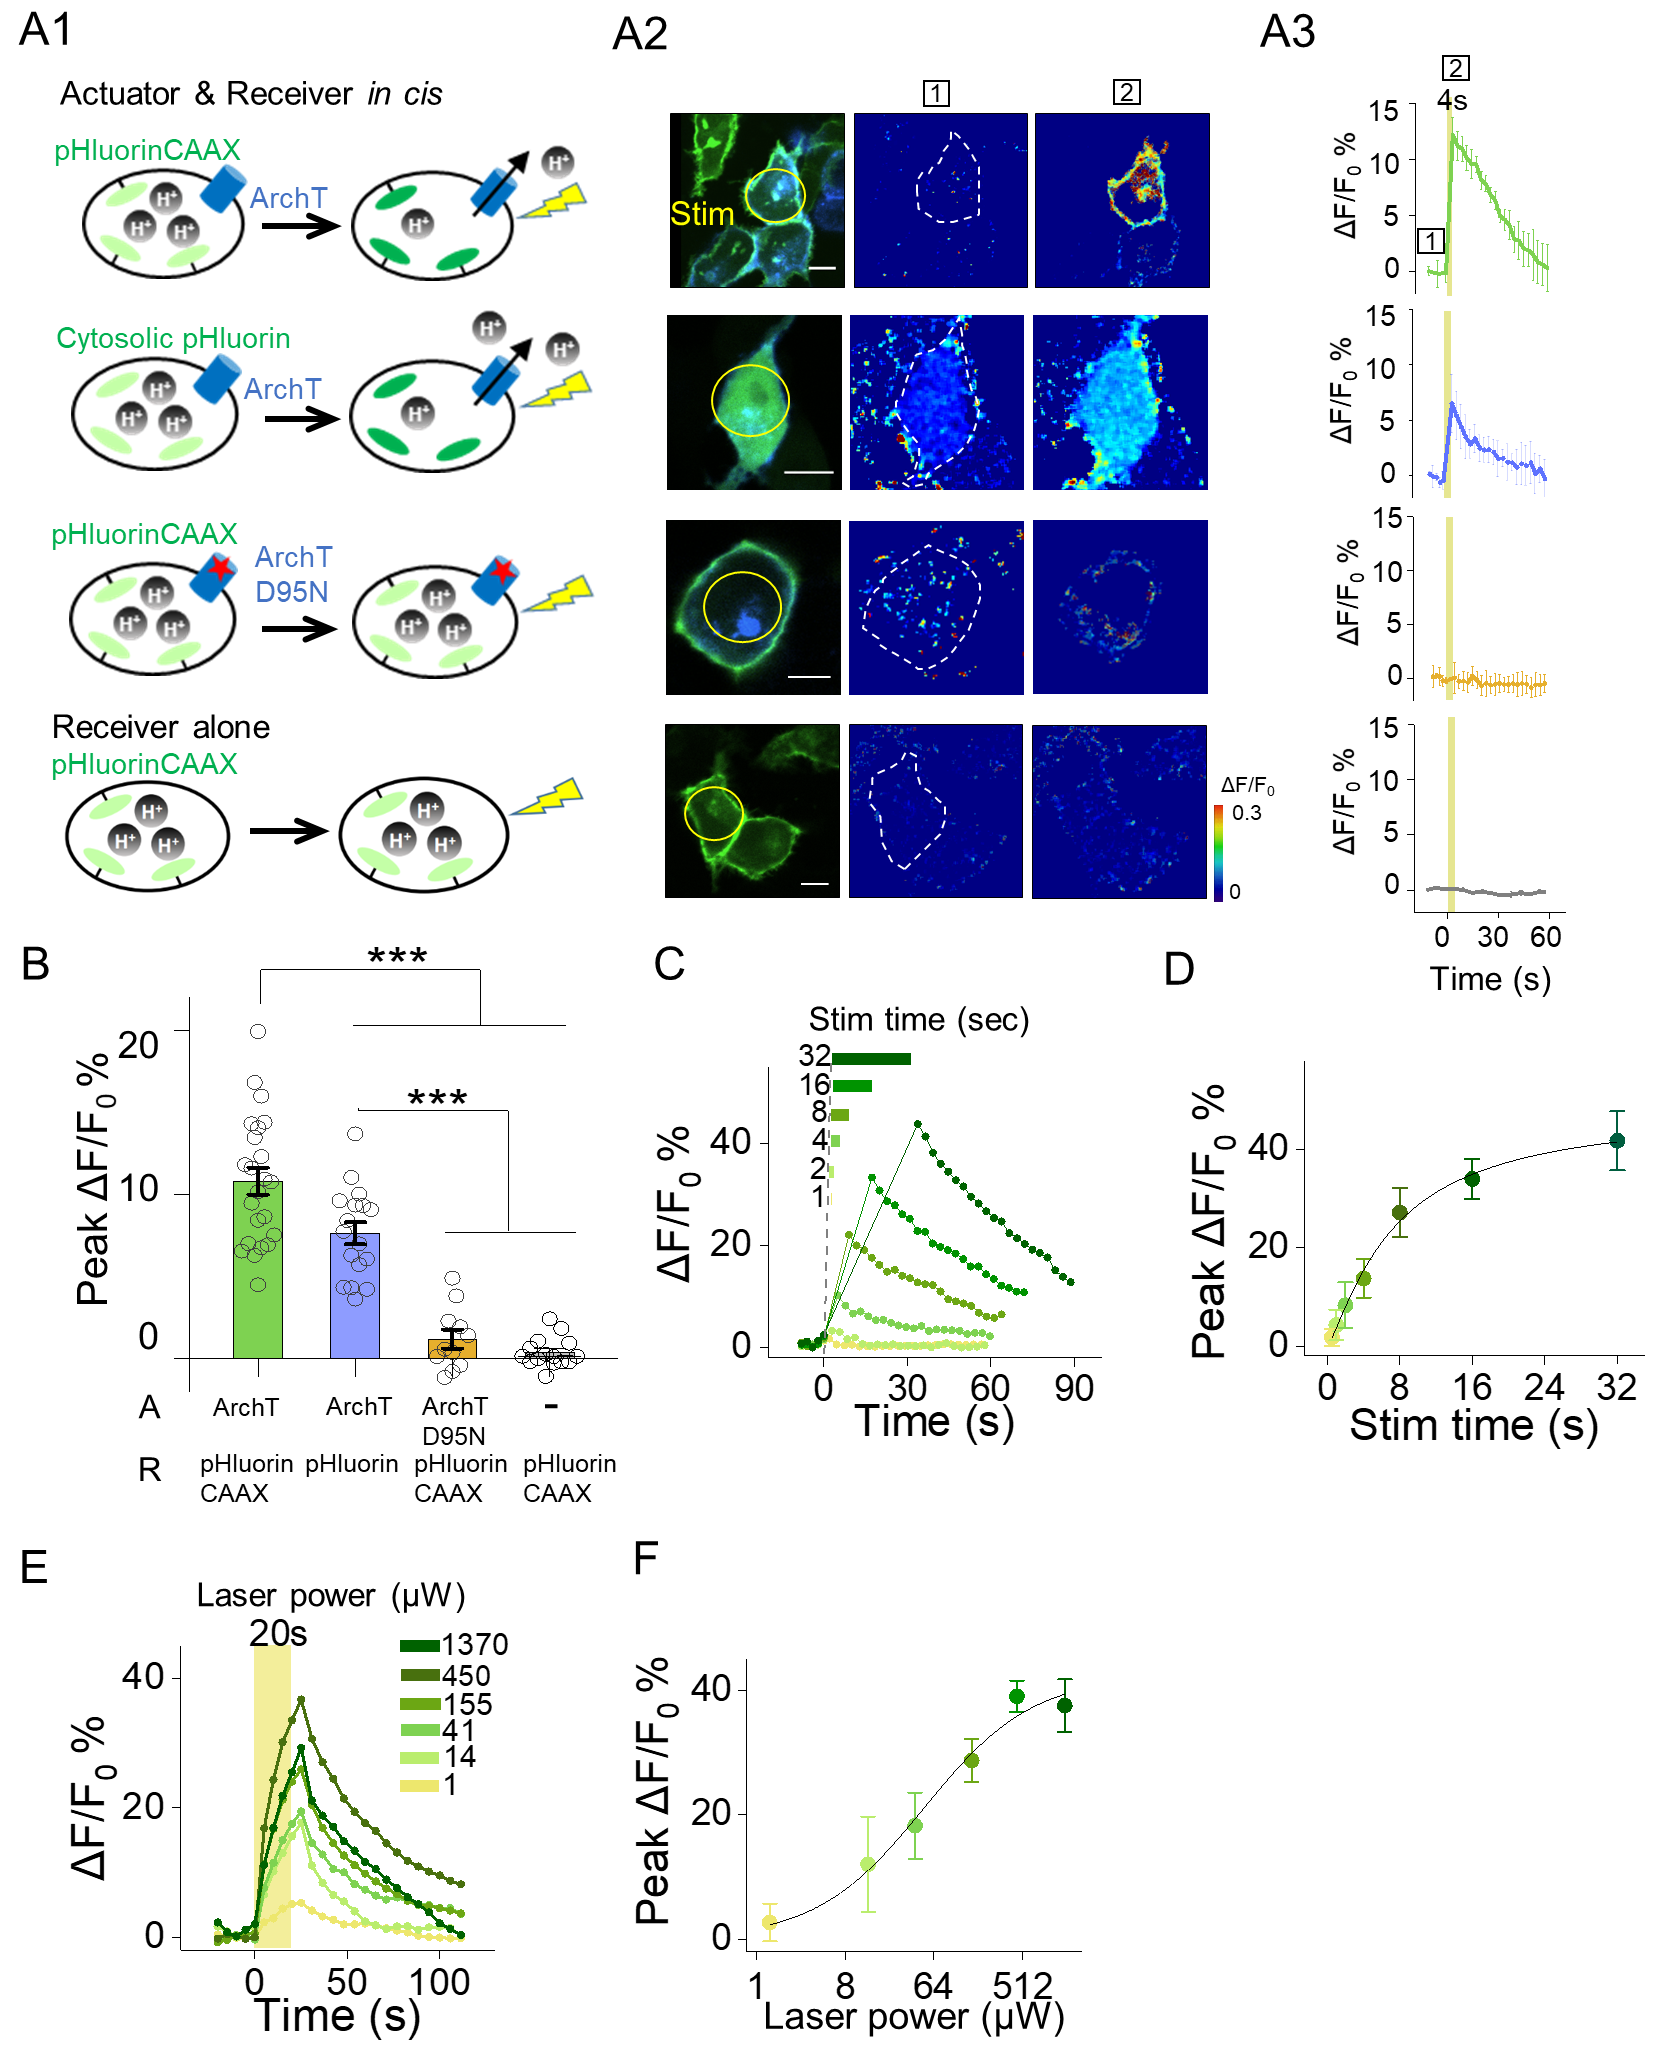

Supplement: supp [file elife-43366-supp-v1.zip › elife_poa_e43366_Figure_1_figure_supplement_2.tif]

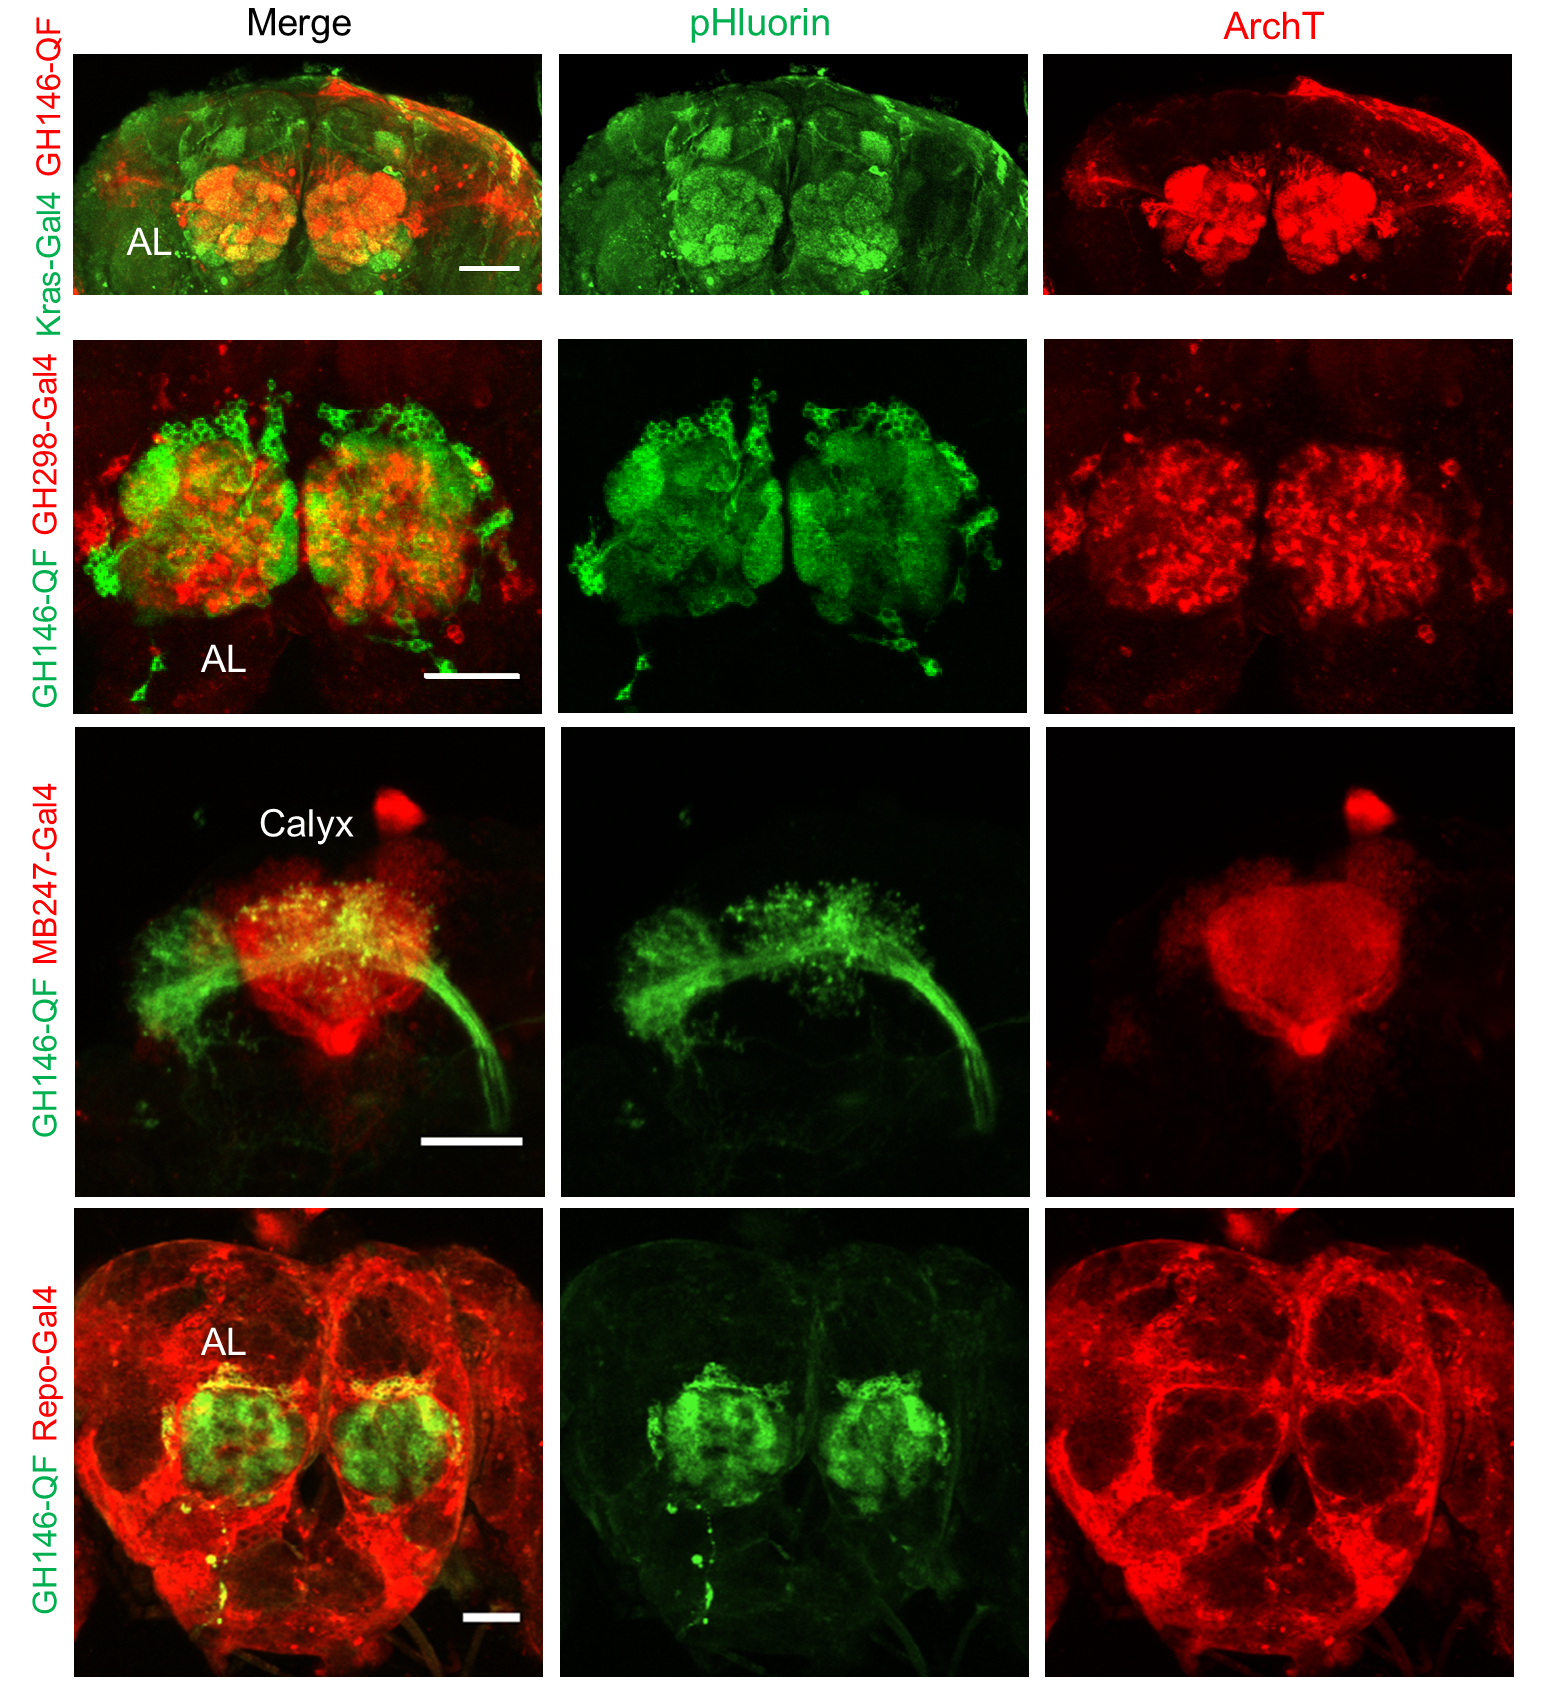

Supplement: supp [file elife-43366-supp-v1.zip › elife_poa_e43366_Figure_4_figure_supplement_2.tif]

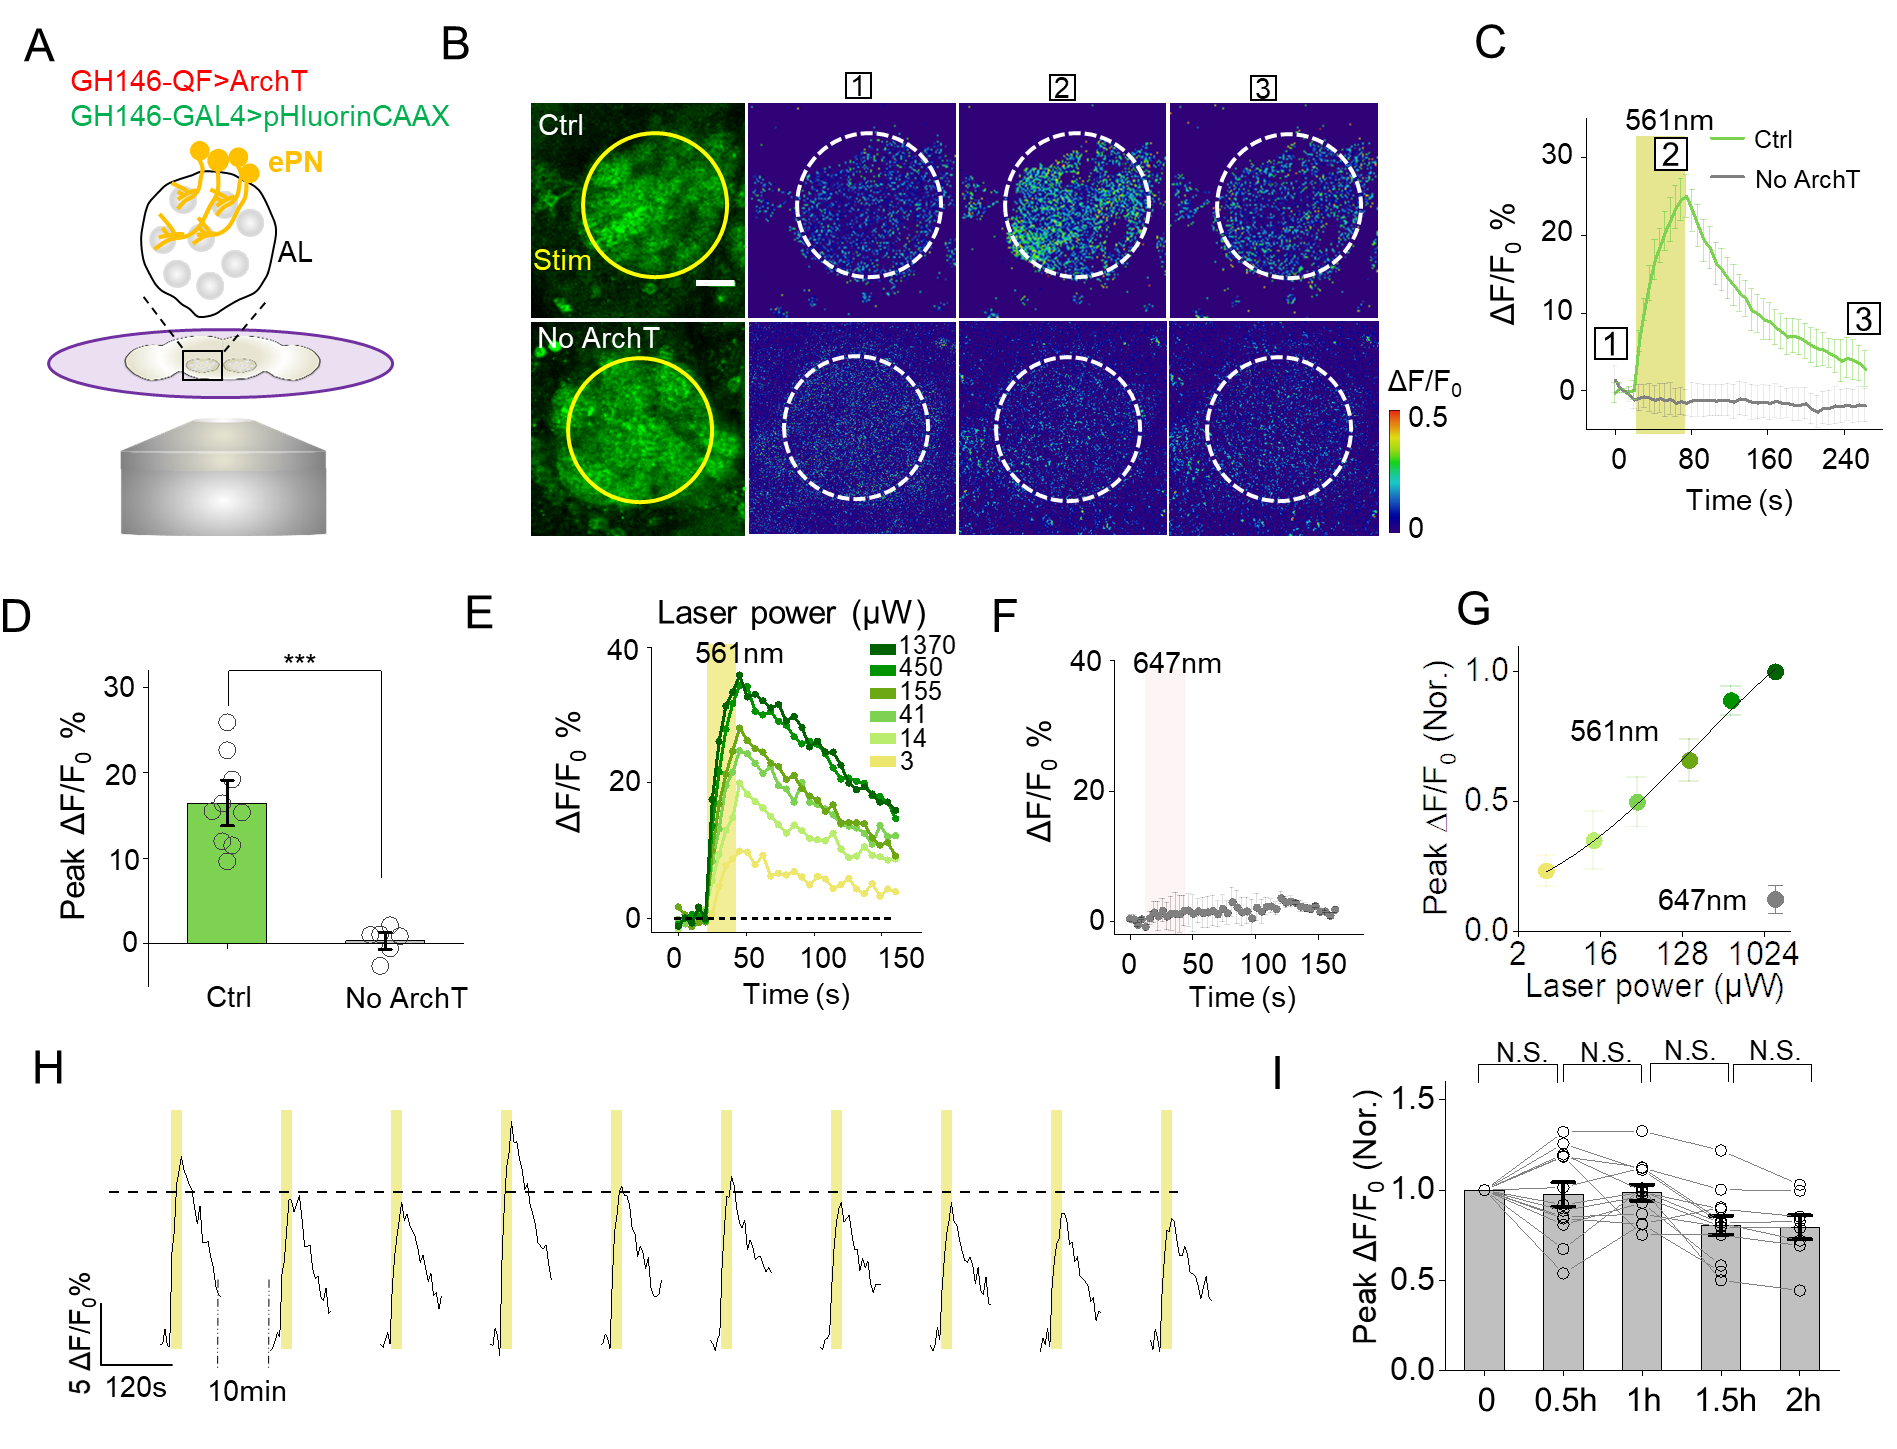

Supplement: supp [file elife-43366-supp-v1.zip › elife_poa_e43366_Figure_4_figure_supplement_1.tif]

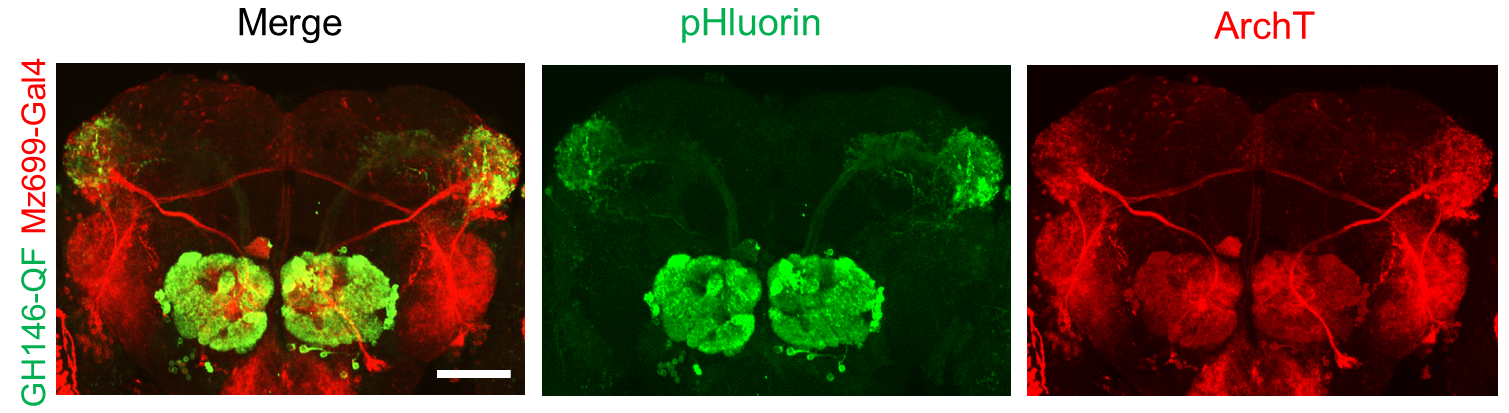

Supplement: supp [file elife-43366-supp-v1.zip › elife_poa_e43366_Figure_5_figure_supplement_1.tif]
